## One small leap for the jumping spider but a giant step for vision science

Robert R. Jackson and Duane P. Harland

10.1242/jeb035899

There was an error published in *J. Exp. Biol.* **212**, 2129-2132.

When this article was originally published online, the author list was incomplete in the PDF and full-text versions of the article and in the online Table of Contents.

The name and affiliation of the second author were missing.

The authors of the paper should have read:

**Robert R. Jackson**

University of Canterbury and International Centre for Insect Physiology and Ecology (Kenya)

**Duane P. Harland**

AgResearch (New Zealand)

This error has now been corrected online.

The print version of the article is correct.

We apologise sincerely to Duane Harland for this error.
